# Supplementary material for: Thermo-, photo-, and mechano-responsive liquid crystal networks enable tunable photonic crystals
Source: Royal Society of Chemistry journal article supplement (doi:10.1039/c7sm01287j), 2017-01-01
Supplement: c7sm01287j1.pdf [file c7sm01287j1.pdf]

## Supplementary information

### Thermo-, Photo-, and Mechano-Responsive Liquid Crystal Networks Enable Tunable Photonic Crystals

Norihisa Akamatsu, Kyohei Hisano, Ryoichi Tatsumi, Miho Aizawa, Christopher J. Barrett, Atsushi Shishido

correspondence to: [ashishid@res.titech.ac.jp](mailto:ashishid@res.titech.ac.jp)

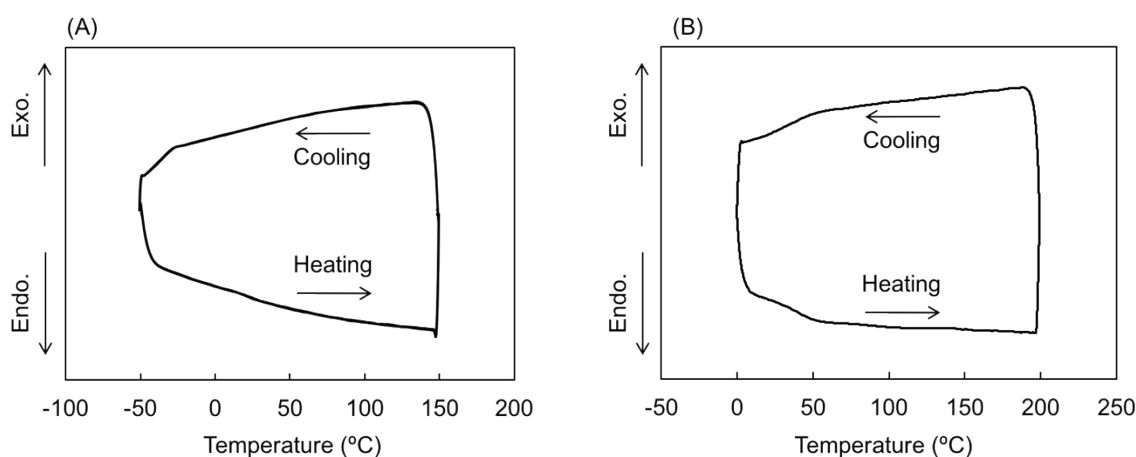

**Fig. S1. DSC thermograms of each layer of the stimuli-responsive bilayered film.**

(A and B) The thermograms (third scan) of an inverse opal film and a liquid crystal network film including azobenzene units at the scanning rate of 10 °C/min, respectively.
